# Supplementary material for: Reliability and validation of the Dutch Achilles tendon Total Rupture Score
Source: PubMed Central journal article supplement (PMC5847201; doi:10.1007/s00167-016-4242-7), 2016-07-14
Supplement: 167_2016_4242_MOESM1_ESM.pdf [file 167_2016_4242_MOESM1_ESM.pdf]

## Appendix I Dutch ATRS

### Achillespees Ruptuur Score (ATRS)

Alle vragen hebben betrekking op uw beperkingen/moeilijkheden met betrekking tot uw aangedane achillespees. Plaats een kruisje in het hokje dat het beste bij uw niveau van beperking past.

De schaal loopt van 0 (geen problemen) tot 10 (onmogelijk).

**1. Wordt u beperkt door een verminderde kracht in de kuit/achillespees/voet?**

0    1    2    3    4    5    6    7    8    9    10  
Geen   Onmogelijk  
Probleem

**2. Wordt u beperkt door vermoeidheid/een vermoeid gevoel in de kuit/achillespees/voet?**

0    1    2    3    4    5    6    7    8    9    10  
Geen   Onmogelijk  
Probleem

**3. Wordt u beperkt door stijfheid/een stijf gevoel in de kuit/achillespees/voet?**

0    1    2    3    4    5    6    7    8    9    10  
Geen   Onmogelijk  
Probleem

**4. Wordt u beperkt door pijn in de kuit/achillespees/voet?**

0    1    2    3    4    5    6    7    8    9    10  
Geen   Onmogelijk  
Probleem

**5. Wordt u beperkt tijdens activiteiten in het dagelijks leven?**

0    1    2    3    4    5    6    7    8    9    10  
Geen   Onmogelijk  
Probleem

**6. Wordt u beperkt/ ondervindt u moeilijkheden bij het lopen op oneffen ondergrond.**

0    1    2    3    4    5    6    7    8    9    10  
Geen   Onmogelijk  
Probleem

**7. Wordt u beperkt wanneer u snel een trap of heuvel op loopt?**

0    1    2    3    4    5    6    7    8    9    10  
Geen   Onmogelijk  
Probleem

**8. Wordt u beperkt tijdens activiteiten waarbij u moet rennen?**

0    1    2    3    4    5    6    7    8    9    10  
Geen   Onmogelijk  
Probleem

**9. Wordt u beperkt tijdens activiteiten waarbij u moet springen?**

0    1    2    3    4    5    6    7    8    9    10  
Geen   Onmogelijk  
Probleem

**10. Wordt u beperkt bij het verrichten van zwaar lichamelijk werk?**

0    1    2    3    4    5    6    7    8    9    10  
Geen   Onmogelijk  
Probleem

Totaalscore: \_\_\_\_\_
